# Supplementary material for: Mechanistic insights into the augmented effect of bone marrow mesenchymal stem cells and thiazolidinediones in streptozotocin-nicotinamide induced diabetic rats
Source: PubMed Central journal article supplement (PMC6026169; doi:10.1038/s41598-018-28029-1), 2018-06-29
Supplement: 41598_2018_28029_MOESM1_ESM.pdf [file 41598_2018_28029_MOESM1_ESM.pdf]

# *Supplementary Information*

Mechanistic insights into the augmented effect of bone marrow mesenchymal stem cells and thiazolidinediones in streptozotocin-nicotinamide induced diabetic rats

**Alaaeldin Ahmed Hamza<sup>1,\*</sup>, Ebtahal Mohammad Fikry<sup>2</sup>, Wedad Abdallah<sup>3</sup>,  
Amr Amin<sup>4,5,†</sup>**

*1 Hormone Evaluation Department, National Organization for Drug Control and Research (NODCAR), Giza, Egypt*

*2,3 Department of Pharmacology, (NODCAR), Giza, Egypt*

*3 Department of Biochemistry, Faculty of Pharmacy, MTI University, Cairo, Egypt*

*4 Biology Department, College of Science, UAE University, Al-Ain, UAE*

*5 Department of Zoology, Faculty of Science, Cairo University, Giza, Egypt*

*\*corresponding to: Alaaeldin A .Hamza*

*E-mail: alaa17mm@gmail.com*

*NODCAR, 6 Abu Hazem St., Pyramids, Giza, Egypt-*

*Tel. 20.01201991433- Fax: +20.2.33933897*

*† corresponding to: Amr Amin*

*E-Mail: a.amin@uaeu.ac.ae*

*Biology Department, UAE University, UAE*

*Tel .97137136519 – Fax: 9713-7134927*

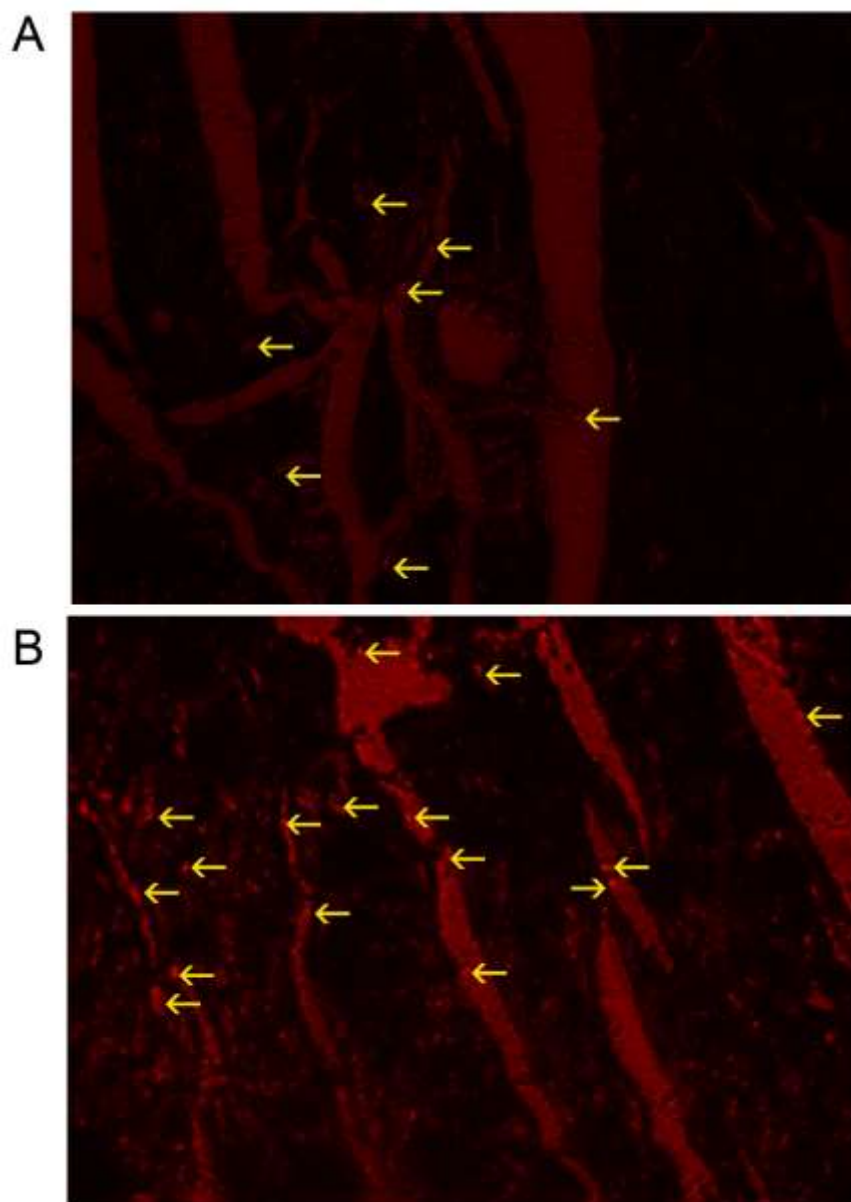

**Figure 1.** Supplementary, Fluorescence microscopy of MSCs (yellow arrows) labeled with immunostained with PKH26 fluorescent dye showing their survival in the myocardium one month after transplantation. 400 $\times$ , A Diabetic rats treated with MSCs, B diabetic rats treated with MSCs + PIO.

***Supplementary Figure 1***

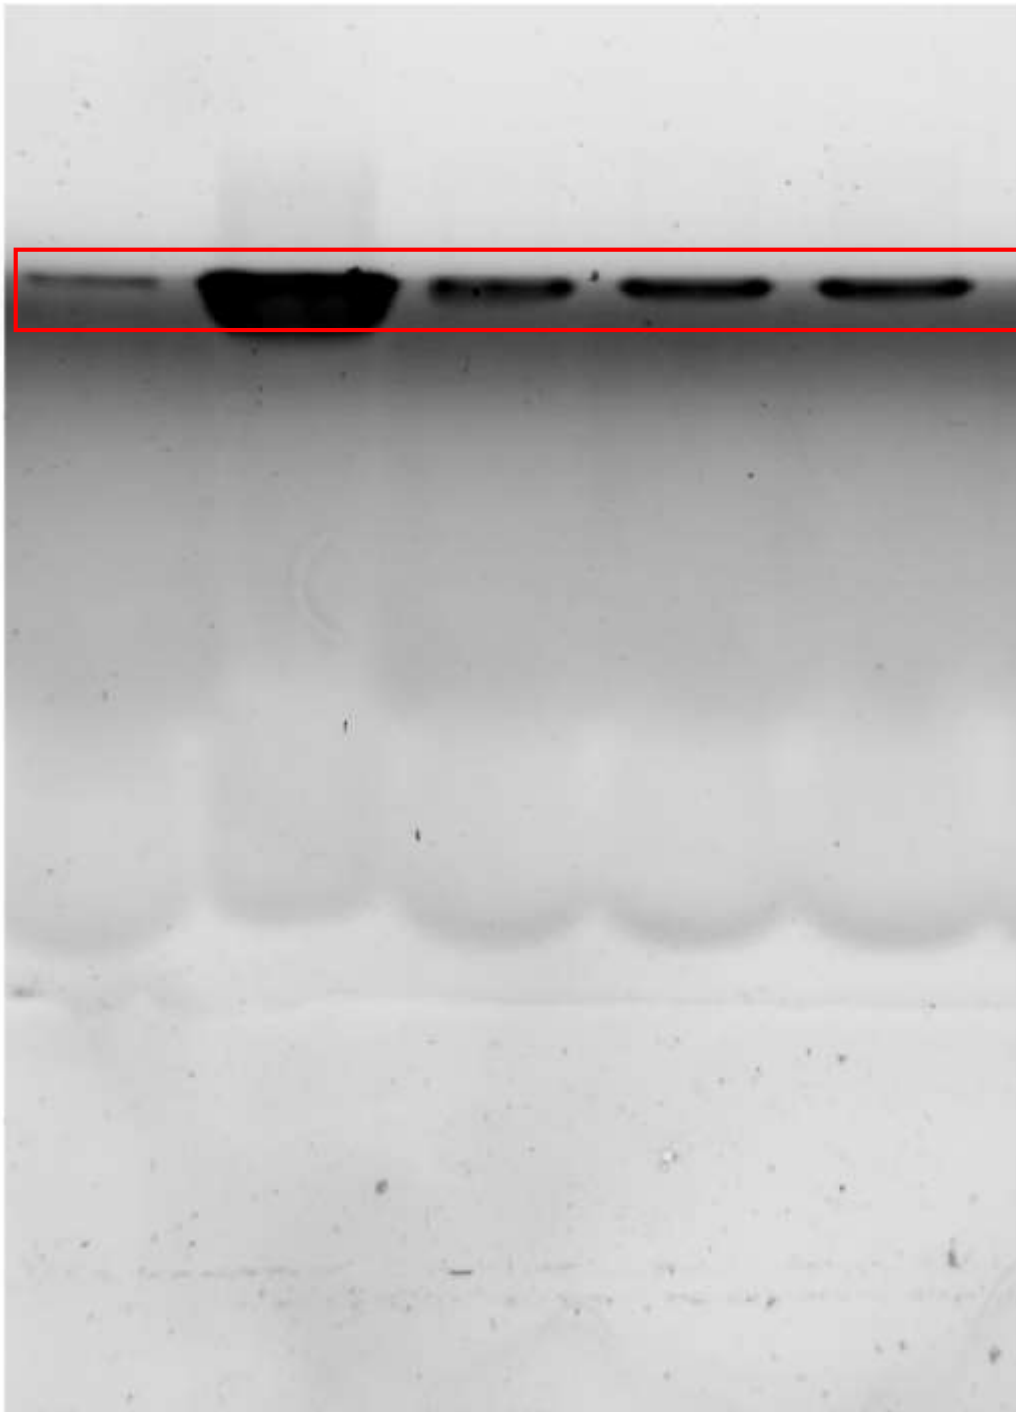

**iNOS**

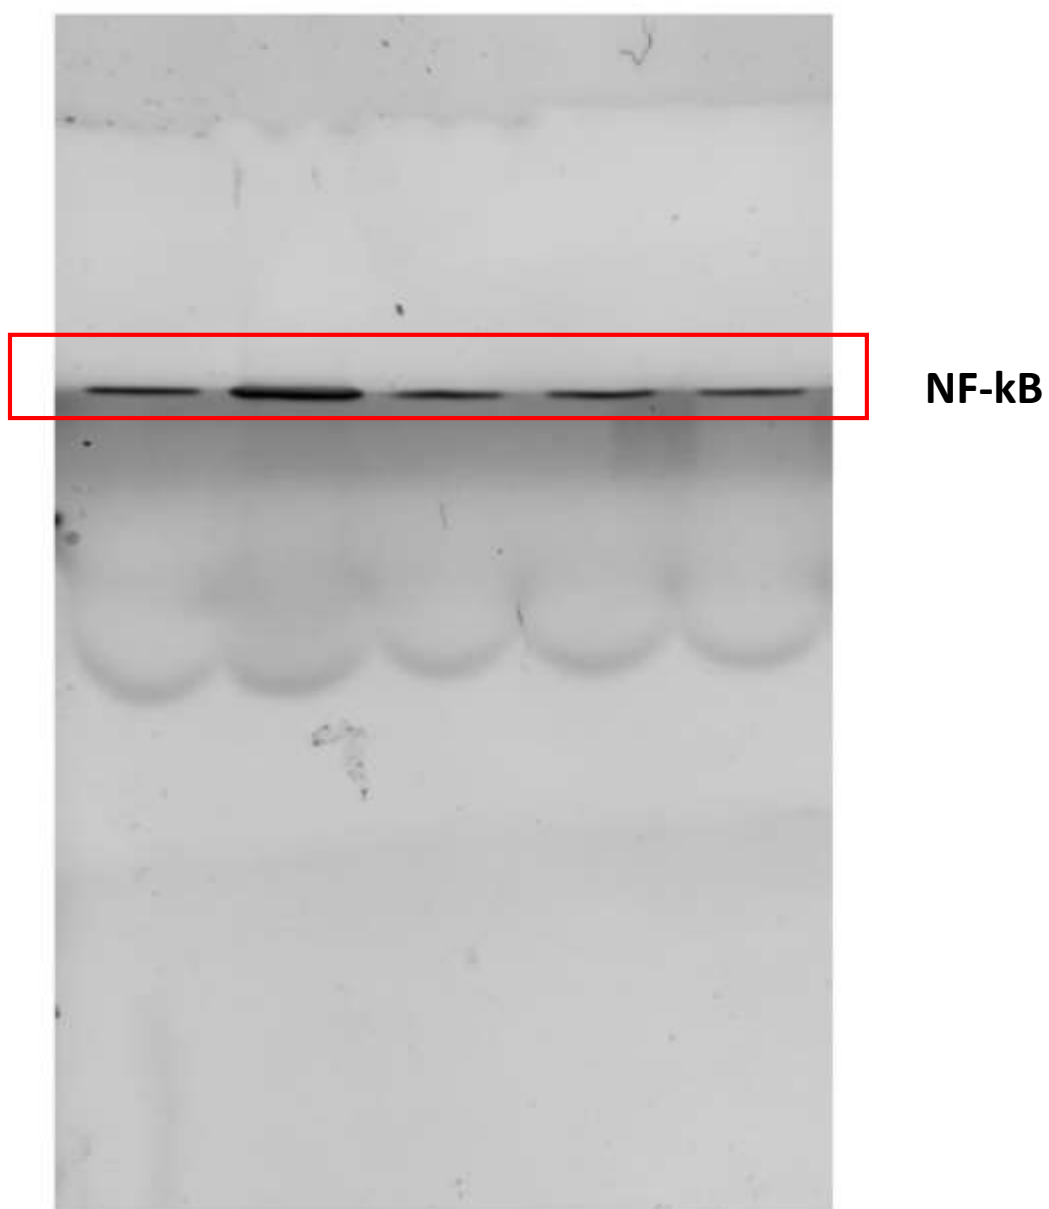

**Supplementary Figure 2. The original blots of figure 5E.**

***Supplementary Figure 2***

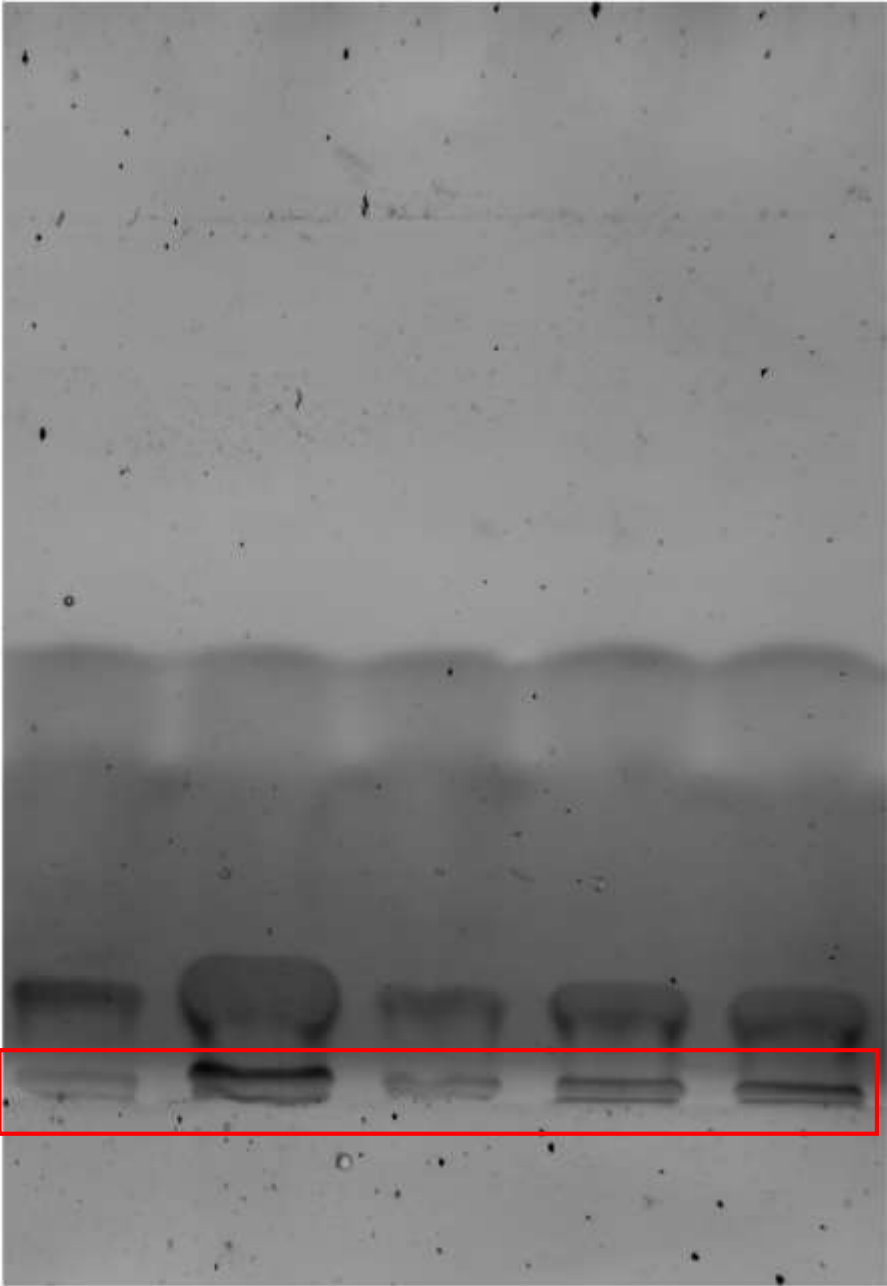

**Cleaved Caspase**

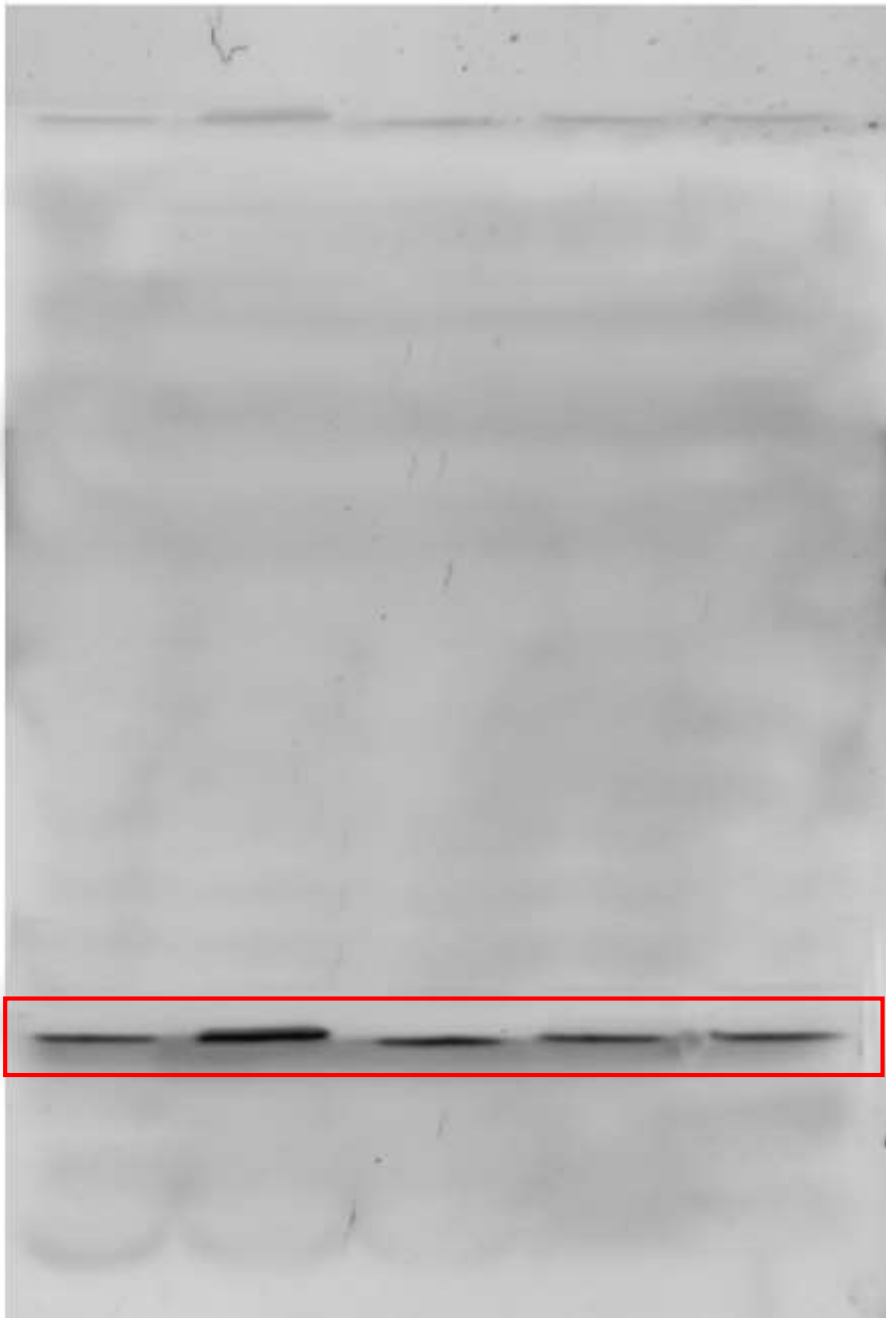

**Bax**

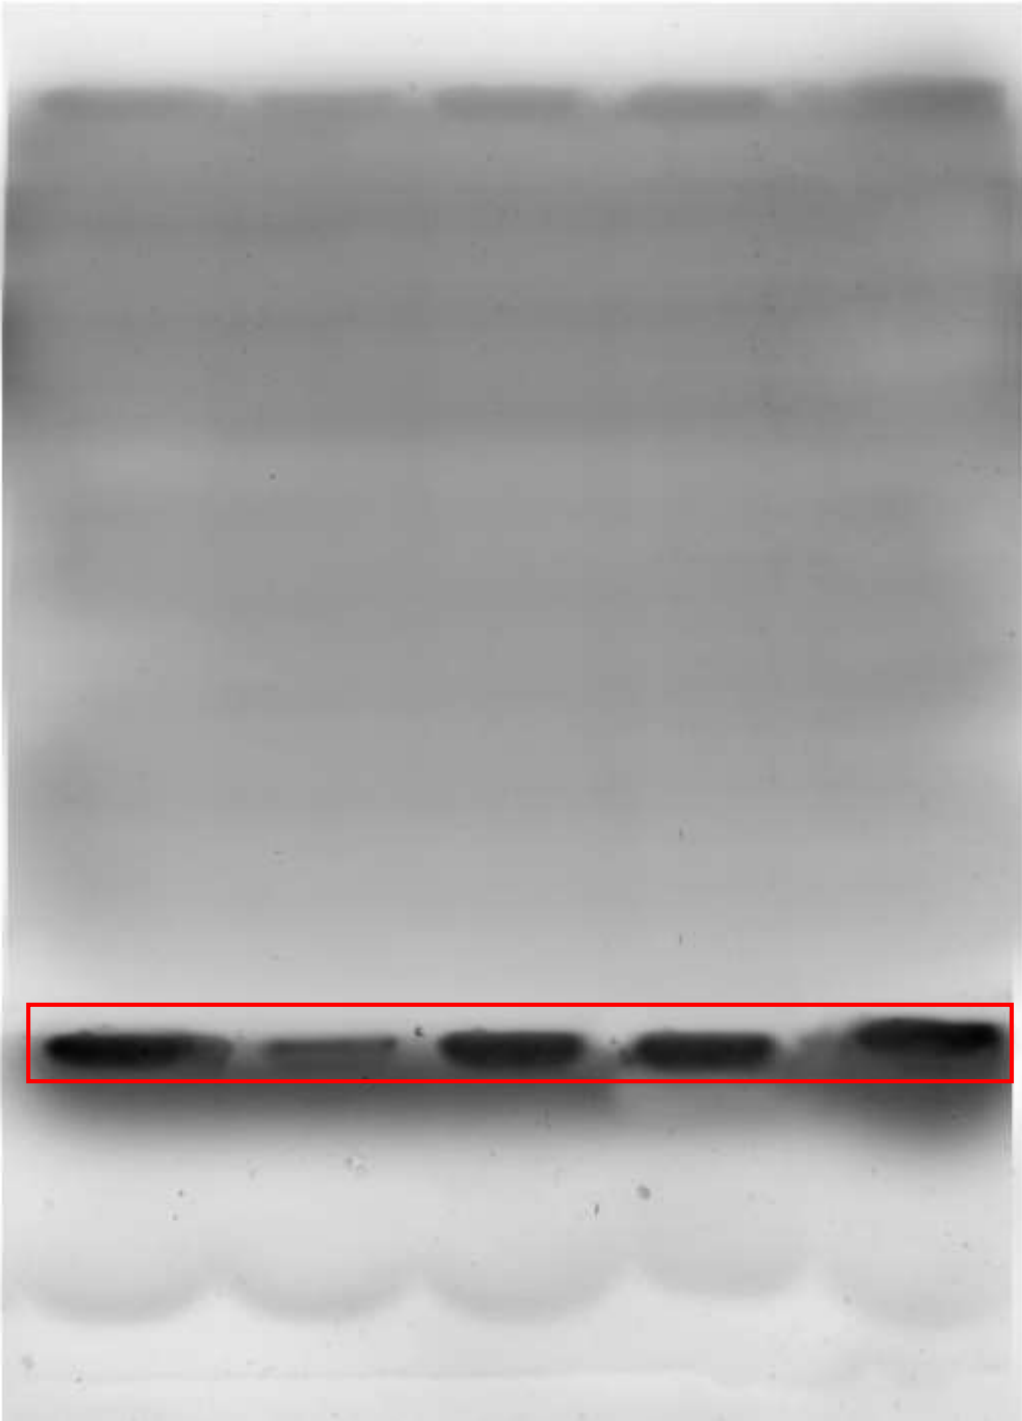

**BCL-2**

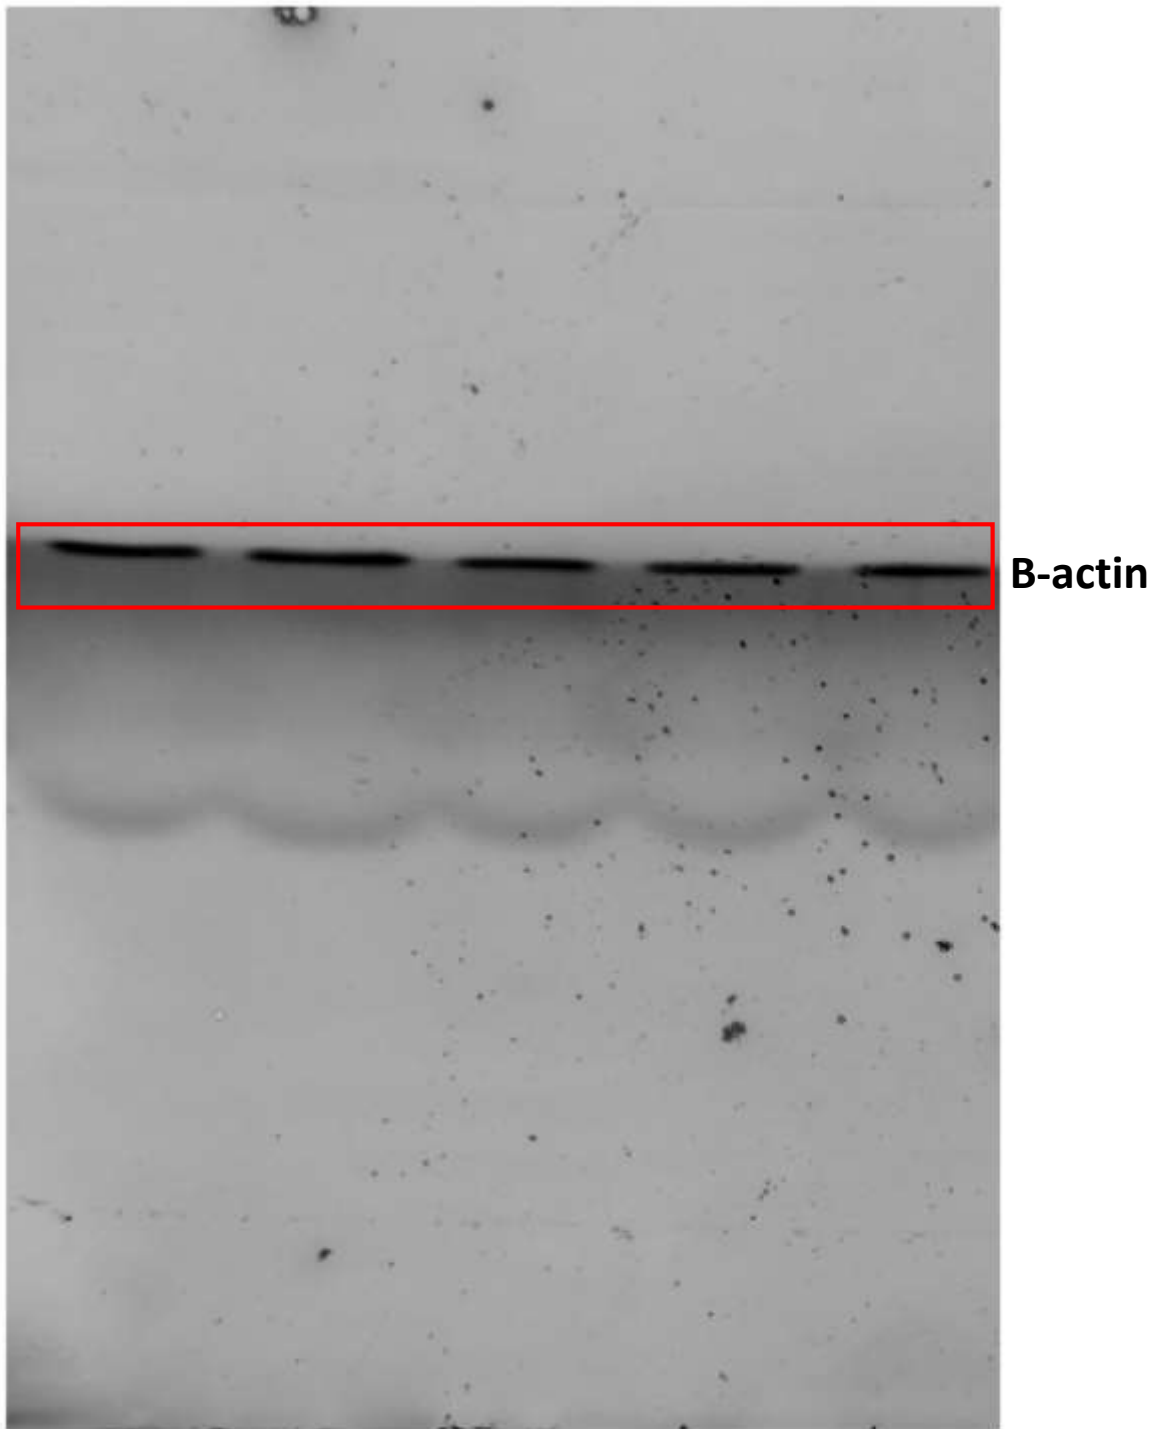

**Supplementary Figure 3. The original blots of figure 6C.**

***Supplementary Figure 3***
